# Supplementary material for: Emulsions synergistic-stabilized by a hydroxyl sulfobetaine surfactant and SiO2 nanoparticles and their potential application for enhanced oil recovery
Source: Royal Society of Chemistry journal article supplement (doi:10.1039/d3ra03427e), 2023-01-01
Supplement: d3ra03427e1.pdf [file d3ra03427e1.pdf]

## Supplementary Material

### Emulsions synergistic-stabilized by hydroxyl sulfobetaine surfactant and SiO<sub>2</sub> nanoparticles and their potential application for enhanced oil recovery

Zhangkun Ren<sup>1</sup>, Lipei Fu<sup>1,\*</sup>, Wenzheng Chen<sup>2</sup>, Xinxin Qiu<sup>1</sup>, Lifeng Chen<sup>3</sup>, Kaili Liao<sup>1</sup>,

Meng Wei<sup>1</sup>, Minglu Shao<sup>1</sup>

1 School of Petroleum Engineering, Changzhou University, Changzhou, 213164, PR China

2 China Petroleum Technology & Development Corporation, Chaoyang District Beijing, 100028, PR China

3 School of Petroleum Engineering, Yangtze University, Wuhan, 434023, PR China

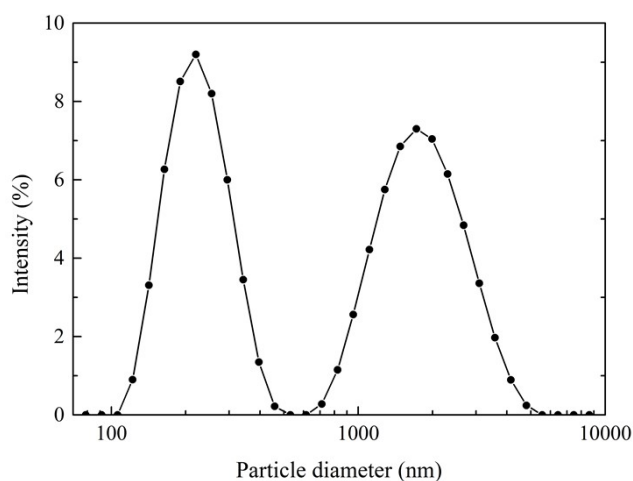

**Fig. S1.** Particle size distribution at 0.1 wt % determined using Zetasizer Nano ZS ZEN3600.

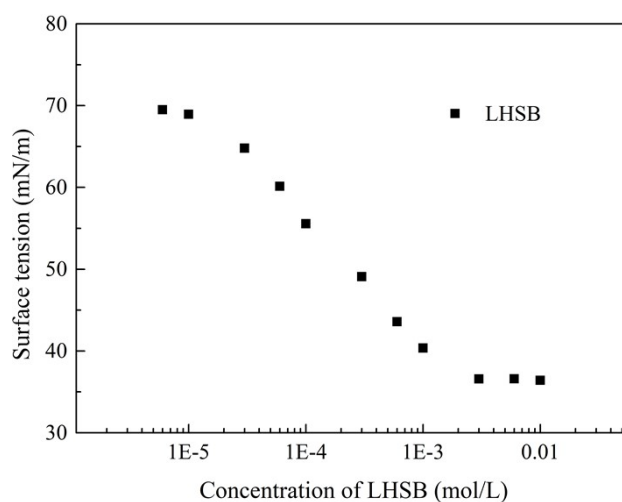

**Fig. S2.** Surface tension of aqueous solutions of LHSB as a function of concentration (25 °C).

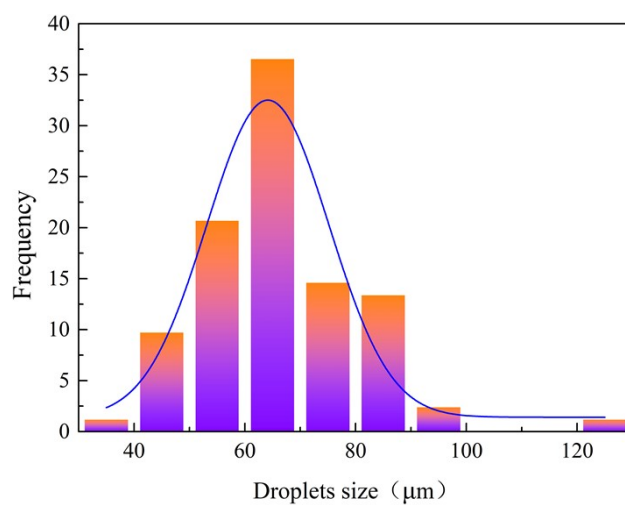

**Fig. S3.** Droplet size distribution of 0.6 mmol/L LHSB stabilized emulsions.

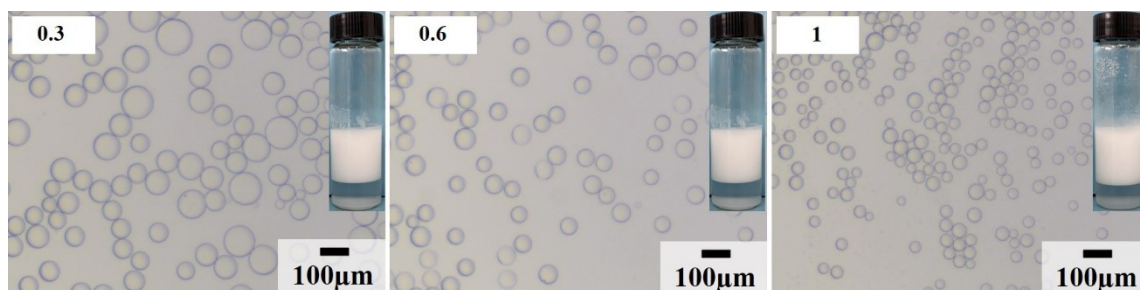

**Fig. S4.** Digital photos and micrographs of emulsions synergistic-stabilized by LHSB and SiO<sub>2</sub> nanoparticles (0.5 wt%) taken 1 month after preparation.

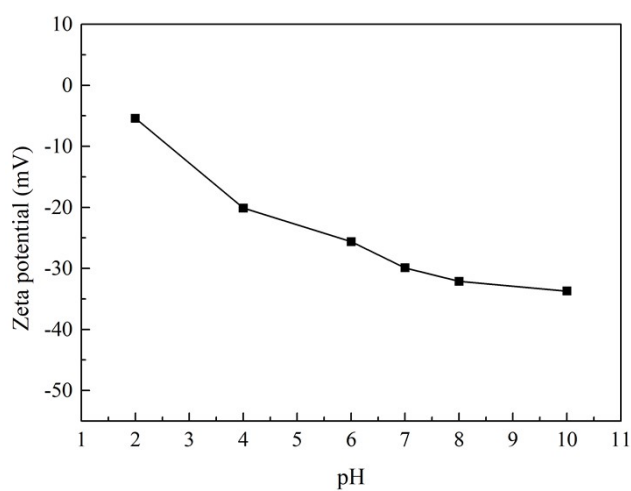

**Fig. S5.** Zeta potential of SiO<sub>2</sub> nanoparticles at different pH conditions.
